# Supplementary material
Source: Springer Nature journal article supplement (https://www.springermedizin.de/resource/supplementary/13054_2013_2163_MOESM3_ESM.pdf/9712524)

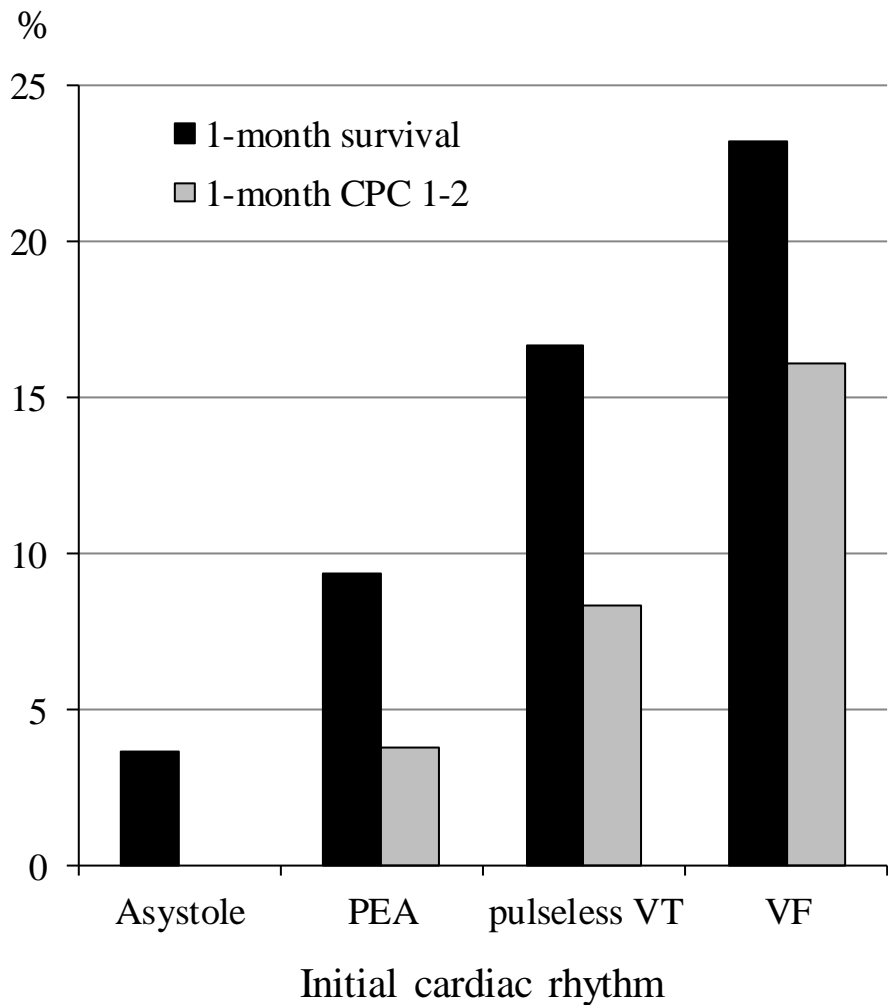

%

25

■ 1-month survival

□ 1-month CPC 1-2

20

15

10

5

0

Asystole

PEA

pulseless VT

VF

Initial cardiac rhythm

Supplement: MOESM3 [file 9712524]
